# Supplementary material
Source: publisher site journal article supplement (https://www.dovepress.com/article/329056)
Supplement: Supplementary file 1 [file get_supplementary_file.php]

## Supplementary material

## Supplemental Table 1: Screening Care Practices of the Study Cohort

| Variables | n(%) |
| --- | --- |
| In your opinion, a reminder will be helpful for self-screening? (yes) | 353(94.39) |
| Have your treating physician referred you for screening test? (yes) | 96(25.53) |
| Did you ever request your treating physician to have a screening test? (yes) | 124(33.24) |
| Did you ever not attend a requested screening test? (yes) | 63(16.94) |
| If you did not attend a screening test, what are the reasons of not attending? |  |
| Busy schedule | 195(79.27) |
| It’s not important | 20(8.13) |
| Scared of positive results | 31(12.60) |
| How many times have you attended a well women clinic?  for female healthcare professionals only (n=243) |  |
| Never | 181(71.26) |
| Once during last year | 12(4.72) |
| Every year | 50(19.69) |
| Received influenza vaccine during last year (yes) | 248(66.31) |

Missing is not reported
